# Supplementary material for: Effects of Atropine Treatment on Choroidal Thickness in Myopic Children
Source: PubMed Central journal article supplement — Invest Ophthalmol Vis Sci. 2020 Dec 15;61(14):15. doi: 10.1167/iovs.61.14.15 (PMC7745623; doi:10.1167/iovs.61.14.15), 2020-12-15

Supplement Figure. Bland-Altman plot illustrating the reproducibility of the average choroidal thickness measured from the 2 repeated scans by one technician.

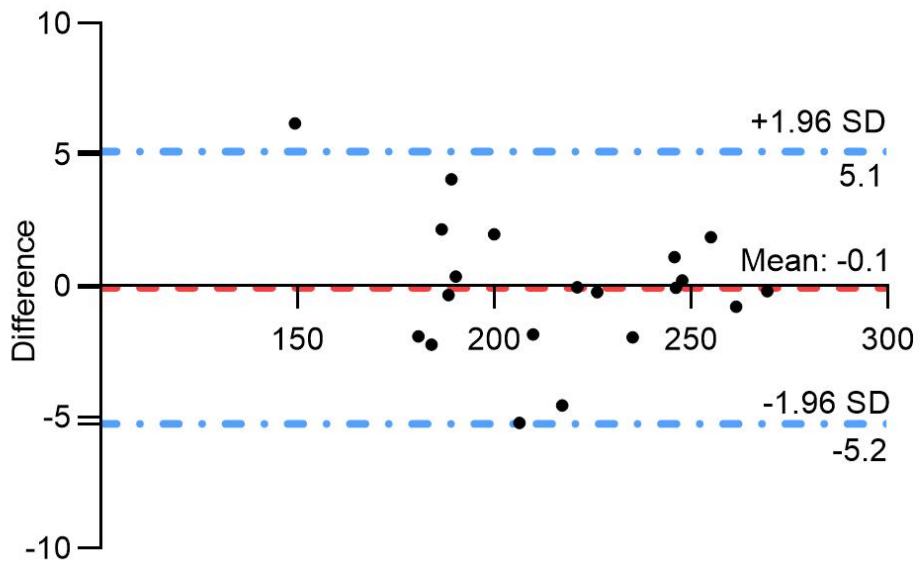

Supplement: iovs-61-14-15_s001.pdf [file iovs-61-14-15_s001.pdf]
