# Supplementary material for: Effects of Atropine Treatment on Choroidal Thickness in Myopic Children
Source: PubMed Central journal article supplement — Invest Ophthalmol Vis Sci. 2020 Dec 15;61(14):15. doi: 10.1167/iovs.61.14.15 (PMC7745623; doi:10.1167/iovs.61.14.15), 2020-12-15
Supplement: iovs-61-14-15_s002.pdf [file iovs-61-14-15_s002.pdf]

Supplement Table. Ocular Biometry in Follow-up Visits Over 6 Months Within

Different Treatment Groups.

|                                               | Group A (n=98) |                | Group B (n=87) |                |
|-----------------------------------------------|----------------|----------------|----------------|----------------|
|                                               | Mean (SD)      | Range          | Mean (SD)      | Range          |
| <b>Average ChT (<math>\mu\text{m}</math>)</b> |                |                |                |                |
| Baseline                                      | 214 (45)       | 97 to 324      | 218 (39)       | 140 to 334     |
| 1 week                                        | 240 (48)       | 109 to 361     | 226 (39)       | 143 to 343     |
| 3 months                                      | 243 (53)       | 101 to 398     | 224 (39)       | 144 to 337     |
| 6 months                                      | 241 (53)       | 118 to 396     | 213 (40)       | 134 to 333     |
| <b>Axial length (mm)</b>                      |                |                |                |                |
| Baseline                                      | 24.34 (0.82)   | 22.50 to 25.94 | 24.27 (0.74)   | 22.66 to 25.96 |
| 1 week                                        | 24.30 (0.82)   | 22.49 to 25.91 | 24.27 (0.73)   | 22.64 to 25.96 |
| 3 months                                      | 24.27 (0.83)   | 22.42 to 25.90 | 24.34 (0.74)   | 22.70 to 26.01 |
| 6 months                                      | 24.30 (0.84)   | 22.31 to 25.89 | 24.46 (0.73)   | 22.93 to 26.15 |
| <b>Internal axial length (mm)</b>             |                |                |                |                |
| Baseline                                      | 24.57 (0.81)   | 22.72 to 26.12 | 24.50 (0.73)   | 22.90 to 26.14 |
| 1 week                                        | 24.57 (0.80)   | 22.72 to 26.11 | 24.51 (0.73)   | 22.91 to 26.17 |
| 3 months                                      | 24.52 (0.81)   | 22.66 to 25.97 | 24.57 (0.73)   | 22.96 to 26.19 |
| 6 months                                      | 24.56 (0.81)   | 22.55 to 26.03 | 24.68 (0.72)   | 23.17 to 26.29 |
| <b>Spherical equivalent (D)</b>               |                |                |                |                |
| Baseline                                      | -2.12 (1.09)   | -5.75 to -0.63 | -2.16 (1.10)   | -5.38 to -0.50 |
| 1 week                                        | -1.74 (1.10)   | -5.38 to -0.13 | -2.25 (1.16)   | -5.75 to -0.25 |
| 3 months                                      | -1.86 (1.15)   | -5.50 to 0.25  | -2.24 (1.15)   | -5.75 to -0.38 |
| 6 months                                      | -1.85 (1.21)   | -6.00 to 0.25  | -2.44 (1.15)   | -5.88 to -0.25 |
| <b>Distance VA (logMAR)</b>                   |                |                |                |                |
| Baseline                                      | -0.02 (0.04)   | -0.18 to 0.10  | -0.03 (0.05)   | -0.18 to 0.10  |
| 1 week                                        | -0.02 (0.03)   | -0.18 to 0.10  | -0.03 (0.05)   | -0.18 to 0.05  |
| 3 months                                      | -0.02 (0.04)   | -0.18 to 0.10  | -0.03 (0.04)   | -0.18 to 0.00  |
| 6 months                                      | -0.03 (0.04)   | -0.08 to 0.05  | -0.04 (0.04)   | -0.18 to 0.05  |
| <b>Near VA (logMAR)</b>                       |                |                |                |                |
| Baseline                                      | 0.01 (0.04)    | 0.00 to 0.22   | 0.02 (0.04)    | 0.00 to 0.22   |
| 1 week                                        | 0.69 (0.22)    | 0.22 to 1.00   | 0.04 (0.08)    | 0.00 to 0.40   |
| 3 months                                      | 0.06 (0.13)    | 0.00 to 0.70   | 0.01 (0.02)    | 0.00 to 0.15   |

|                                    |              |               |              |               |
|------------------------------------|--------------|---------------|--------------|---------------|
| 6 months                           | 0.03 (0.12)  | 0.00 to 1.00  | 0.00 (0.02)  | 0.00 to 0.10  |
| <b>Pupil size (mm)</b>             |              |               |              |               |
| Baseline                           | 5.05 (1.10)  | 3.20 to 6.70  | 5.20 (0.82)  | 3.20 to 6.40  |
| 1 week                             | 7.52 (0.60)  | 5.90 to 9.40  | 6.03 (0.87)  | 4.20 to 8.40  |
| 3 months                           | 6.93 (0.88)  | 4.30 to 9.20  | 6.05 (0.86)  | 4.20 to 8.10  |
| 6 months                           | 6.64 (1.07)  | 3.80 to 8.80  | 5.41 (1.08)  | 3.20 to 8.20  |
| <b>Accommodation amplitude (D)</b> |              |               |              |               |
| Baseline                           | 12.43 (3.05) | 6.00 to 20.00 | 12.59 (3.49) | 6.00 to 25.00 |
| 1 week                             | 0.88 (3.21)  | 0.50 to 3.00  | 9.71 (3.58)  | 4.00 to 22.00 |
| 3 months                           | 8.18 (3.41)  | 0.50 to 18.00 | 10.78 (3.10) | 5.00 to 20.00 |
| 6 months                           | 9.41 (3.28)  | 1.25 to 20.0  | 11.49 (3.14) | 5.00 to 22.00 |

Data are presented as mean (standard deviation, SD) and range. ChT = choroidal thickness; D = diopter; logMAR = logarithm of the minimum angle of resolution; VA = visual acuity.

---
